# Supplementary material for: Ferroelectric properties, narrow band gap and ultra-large reversible entropy change in a novel nonlinear ionic chromium(vi) compound
Source: Royal Society of Chemistry journal article supplement (doi:10.1039/d1cc04751e), 2021-01-01
Supplement: d1cc04751e1.pdf [file d1cc04751e1.pdf]

## ***Electronic Supplementary Materials (ESI)***

### **Ferroelectric properties, narrow band gap and ultra-large reversible entropy change in a novel nonlinear ionic chromium (VI) compound**

**Ding-Chong Han, Zhi-Xiang Gong, Ning Song, Yu-Hui Tan,\* Yu-Kong Li, Yun-Zhi Tang,\* Peng-Kang Du and Hao Zhang**

\*Faculty of Materials Metallurgy and Chemistry, Jiangxi University of Science and Technology, Ganzhou 341000, Jiangxi Province, P. R. China

#### **Experimental section**

##### **Synthesis**

All chemicals and reagents were purchased directly from the chemical reagent company and used directly without further purification. The synthesis of compound **1** is mainly carried out in two steps: the first step is the synthesis of precursor: measured 50 mL of triethylamine and poured into a round-necked flask, then measured 100 mL of dichloromethane as the solvent and the reactant to pour into the flask, heated and stirred in a water bath at a constant temperature of 70 °C for 72 hours, filtered and left the clear liquid to volatilize into a white solid, and finally dried it to become the precursor chloromethyl-triethylammonium chloride; in the second step, weighed the precursor (0.186 g, 1 mmol) and dissolved it in 15 mL of deionized water, then weighed chromium trioxide (0.099 g, 1 mmol) and poured into the solution, stirred for 45 min, filtered to obtain an orange-yellow solution, and finally volatilized at room temperature for about 2 weeks to obtain an orange-yellow block crystals (yield 36 %). The purity of compound **1** was well confirmed by the infrared spectrum (IR) (**Fig. S1**) and powder X-ray diffraction (PXRD) pattern (**Fig. S2**). Elemental analysis calcd. for compound **1**: C: 29.385 %, N: 4.896 %, H: 5.988 %; Found: C: 29.32 %, N: 4.96 %, H: 5.94 %. IR (KBr, cm<sup>-1</sup>) analysis for compound **1**: 3740 (w), 3410 (w), 2987 (w), 2360 (w), 1639 (w), 1469 (m), 1153 (m), 943 (s), 803 (m), 426 (m).

##### **Differential Scanning Calorimetry (DSC)**

DSC tests were performed on a Perkin-Elmer Diamond DSC Instrument. The compound **1** (7.2 mg) using powder samples were placed in aluminum crucibles, and were tested in a temperature range of 315 K-370 K under a nitrogen atmosphere at a heating/cooling rate of 10 K/min.

##### **Thermogravimetric Analysis (TGA)**

TGA measurements of compound **1** (2 mg) were carried out on a TA-Instrument STD2960 system at a heating rate of 10 K/min under a nitrogen atmosphere in the temperature range of 310 K-1050 K. During the heating process, the peak of the DTA pattern at 340.5 K was an endothermic peak, while the exothermic decomposition peak was around 443 K. The arrow marked in the figure is the direction of heat release.

##### **X-Ray Single-Crystal Crystallography**

The X-ray single crystal diffraction data of compound **1** was collected on a Rigaku Oxford Diffraction with Mo K $\alpha$  radiation ( $\lambda = 0.71073 \text{ \AA}$ ) at the room temperature. The data was corrected for  $L_p$  and absorption effects. The structure was solved by direct methods and refined by the full-matrix methods based on  $F^2$  by using the SHELXLTL software package. All non-hydrogen atoms were refined anisotropically, and all hydrogen atoms were generated geometrically and refined by using a "riding" model with  $U_{iso} = 1.2 U_{eq}$  (C). The occupancy rate of the disordered part was refined with free variables. The crystallographic data and structural refinement details of compound **1** are shown in **Table S1**. The CCDC (Cambridge Crystallographic Data Centre) of compound **1** is No.: 2091371.

##### **Powder X-Ray Diffraction (PXRD) and Elemental Analysis**

Variable-Temperature PXRD measurements of compound **1** on a PANalytical X' Pert PRO X-ray diffractometer were carried out in the temperature range of 300 K-370 K and the diffraction patterns were collected in the range of  $2\theta = 5^\circ$ - $50^\circ$  with a step size of  $0.02^\circ$ . Elemental analysis (C, H, N) of compound **1** was performed by elemental vario EL cube organic element analyzer, Germany.

#### Dielectric Constant Measurements

For dielectric experiments, the pressed powder pellets (0.2 mm thick and  $3 \text{ mm}^2$  in area) of compound **1** were sandwiched between two parallel copper electrodes with silver-conducting glue to be used for dielectric measurements. The temperature-dependent dielectric constants tests were carried out using the sample on a TH2828A instrument between 303 K-355 K over the frequency range of 500 Hz to 1 MHz, with an applied electric field of 1 V, controlling heating and cooling rate of 10 K/min.

#### Second Harmonic Generation (SHG) Measurements

The SHG signal tests of powder samples of compound **1**, using an unexpanded laser beam with low divergence (pulsed Nd: YAG at a wavelength of 1064 nm, 5 ns pulse duration, 1.6 MW peak power, 10 Hz repetition rate) were carried out on the Ins1210058, INSTEC Instruments at the room temperature.

#### Solid-State Circular Dichroism (CD) Spectra

The CD spectra for compound **1** were recorded on a Jasco-1500 CD spectropolarimeter at the room temperature in the wavelength range 200 nm-700 nm. The CD spectra were obtained on the resulting complexes as crystals (ca. 0.4 mg) in 100 mg of oven-dried KBr made into disks of 0.3 mm thickness.

#### Ultraviolet-Visible (UV-vis) Spectrometry

The UV-vis absorption spectrum was obtained at room temperature in the wavelength range of 200 nm-700 nm by using a Shimadzu (Tokyo, Japan) UV-2550 spectrophotometer by measuring the powder of compound **1**. Determining the band gap with the variation of Tauc equation:<sup>1</sup>

$$[h\nu \cdot F(R_\infty)]^{1/n} = A(h\nu - E_g)$$

where  $h$  is the Planck's constant,  $\nu$  represents the frequency of vibration,  $A$  is the proportional constant,  $E_g$  is the band gap and  $F(R_\infty)$  is Kubelka-Munk equation:  $F(R_\infty) = (1 - R_\infty)^2 / 2R_\infty$ .<sup>2</sup>

#### Ferroelectric Property

The ferroelectric property of single crystal samples of compound **1** were measured by using a standard RT 6000 ferroelectric tester (Radiant Technologies, Albuquerque, USA) at different temperatures after the samples were immersed in insulating oil and dried at the room temperature. And the polarization-electric hysteresis loops were observed by virtual ground mode (the measurement used alternating current and the frequency was 10-60 Hz).

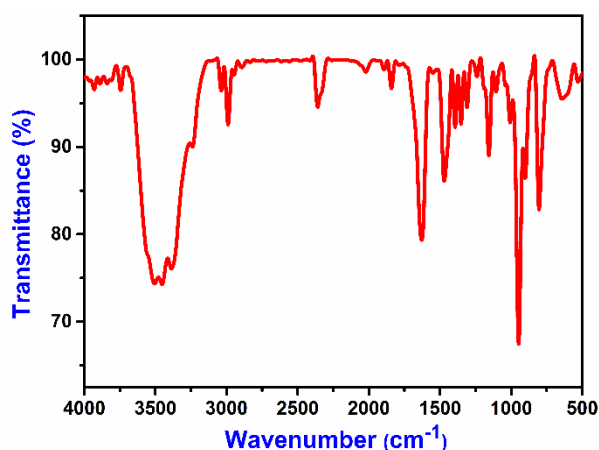

Fig. S1 Infrared (IR) spectra of solid compound **1** at room temperature.

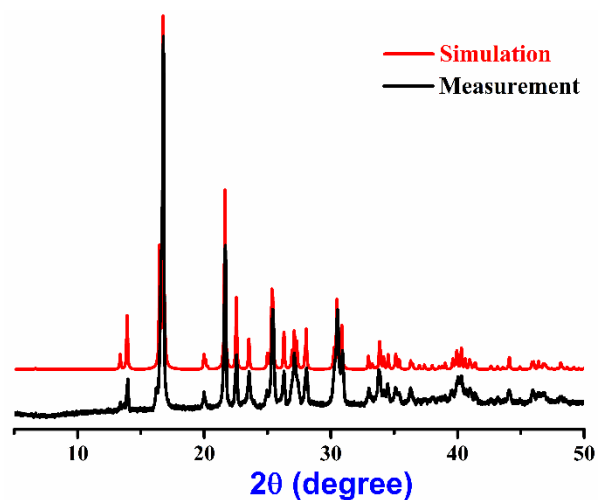

Fig. S2 PXRD (powder x-ray diffraction) measurement comparison with single crystal simulation of compound **1** at room temperature.

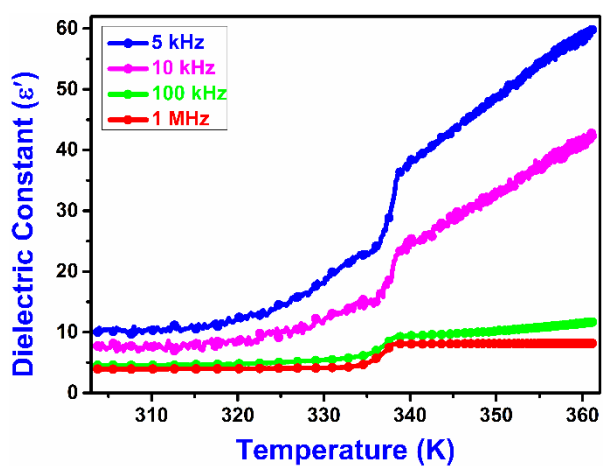

Fig. S3 Temperature dependence of the real parts ( $\epsilon'$ ) of the dielectric constants for compound **1** at selected frequencies (5 kHz, 10 kHz, 100 kHz and 1 MHz).

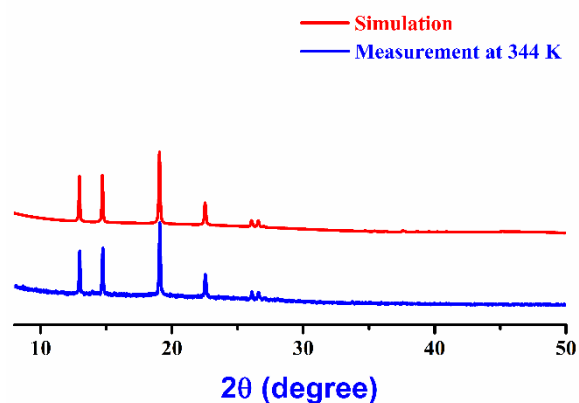

Fig. S4 Le Bail refinement of PXRD data of compound **1** at 344 K, revealing a unit cell of  $a = 7.89479 \text{ \AA}$ ,  $b = 7.89479 \text{ \AA}$ ,  $c = 12.7266 \text{ \AA}$ ,  $\alpha = 90^\circ$ ,  $\beta = 90^\circ$  and  $\gamma = 120^\circ$ .

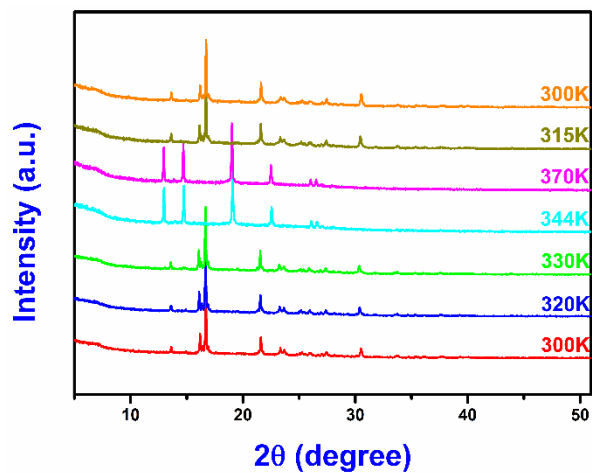

Fig. S5 Variable-Temperature PXRD for compound **1** in the temperature range of 300 K-370 K.

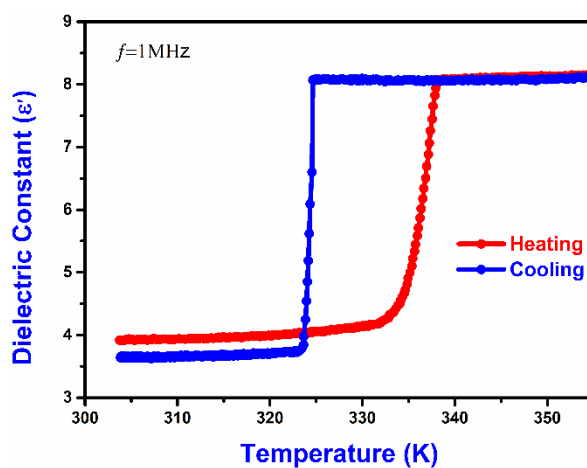

Fig. S6 The temperature-dependence of dielectric constant at 1MHz during heating and cooling runs for compound **1**.

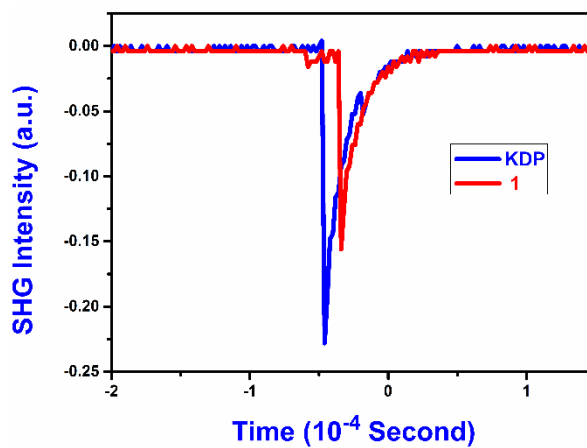

Fig. S7 The comparison of KDP, SHG response of compound **1** under the same condition.

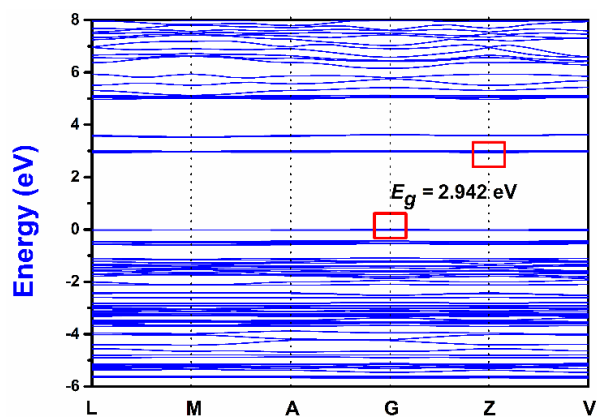

**Fig. S8** The calculation diagram band structures of compound **1**.

**Table S1.** The crystallographic data and structure refinements for compound **1** at the room temperature.

| [(CH <sub>3</sub> CH <sub>2</sub> ) <sub>3</sub> N(CH <sub>2</sub> Cl)] [CrO <sub>3</sub> Cl] |             |                                                         |                                   |
|-----------------------------------------------------------------------------------------------|-------------|---------------------------------------------------------|-----------------------------------|
| 298 K                                                                                         |             |                                                         |                                   |
| Formula weight                                                                                | 286.11      | Z                                                       | 4                                 |
| Crystal system                                                                                | monoclinic  | Density (g/cm <sup>3</sup> )                            | 1.539                             |
| Space group                                                                                   | C2          | m (mm <sup>-1</sup> )                                   | 1.342                             |
| <i>a</i> (Å)                                                                                  | 11.8344(6)  | F (000)                                                 | 592.0                             |
| <i>b</i> (Å)                                                                                  | 7.8851(3)   | Data/restraints/parameters                              | 2527/3/173                        |
| <i>c</i> (Å)                                                                                  | 14.4218(12) | GOF                                                     | 1.097                             |
| $\alpha$ (°)                                                                                  | 90          | $R_1, wR_2 [I \geq 2\sigma(I)]$                         | $R_1 = 0.0346$<br>$wR_2 = 0.1007$ |
| $\beta$ (°)                                                                                   | 113.414(5)  | $R_1, wR_2$ (all data)                                  | $R_1 = 0.0369$<br>$wR_2 = 0.1026$ |
| $\gamma$ (°)                                                                                  | 90          | $\Delta\rho_{max}/\Delta\rho_{min}$ (eÅ <sup>-3</sup> ) | 0.31/-0.49                        |
| <i>V</i> (Å <sup>3</sup> )                                                                    | 1234.96(14) |                                                         |                                   |

## Calculation of $\Delta S$ and $N$

### In the heating cycle mode

$$\Delta S_1 = R \ln N_1$$

$$\Delta S_1 = \int_{T_2}^{T_1} \frac{Q}{T} dT$$

$$\approx \frac{\Delta H}{T_c}$$

$$= \frac{75.65 \text{ g}^{-1} \text{ J} \times 286.11 \text{ mol}^{-1} \text{ g}}{340.9 \text{ K}}$$

$$= 63.49 \text{ J} \cdot \text{mol}^{-1} \cdot \text{K}^{-1}$$

$$N_1 = \exp\left(\frac{\Delta S_1}{R}\right) = \exp\left(\frac{63.49 \text{ J} \cdot \text{mol}^{-1} \cdot \text{K}^{-1}}{8.314 \text{ J} \cdot \text{mol}^{-1} \cdot \text{K}^{-1}}\right)$$

$$= 2072$$

### In the cooling cycle mode

$$\Delta S_2 = R \ln N_2$$

$$\Delta S_2 = \int_{T_2}^{T_1} \frac{Q}{T} dT$$

$$\approx \frac{\Delta H}{T_c}$$

$$= \frac{71.48 \text{ g}^{-1} \text{ J} \times 286.11 \text{ mol}^{-1} \text{ g}}{322.15 \text{ K}}$$

$$= 63.48 \text{ J} \cdot \text{mol}^{-1} \cdot \text{K}^{-1}$$

$$N_2 = \exp\left(\frac{\Delta S_2}{R}\right) = \exp\left(\frac{63.48 \text{ J} \cdot \text{mol}^{-1} \cdot \text{K}^{-1}}{8.314 \text{ J} \cdot \text{mol}^{-1} \cdot \text{K}^{-1}}\right)$$

$$= 2070$$

## Notes and references

- 1 J. Tauc, *Mater. Res. Bull.*, 1970, **5**, 721-729.
- 2 W. J. Wei, C. Li, L. S. Li, Y. Z. Tang, X. X. Jiang and Z. S. Lin, *J. Mater. Chem. C*, 2019, **7**, 11964-11971.
